# Supplementary material for: Approaches to identifying drug resistance mechanisms to clinically relevant treatments in childhood rhabdomyosarcoma
Source: PubMed Central journal article supplement (PMC8992598; doi:10.20517/cdr.2021.112), 2022-01-04
Supplement: cdr-5-80-SupplementaryMaterials.pdf [file cdr-5-80-SupplementaryMaterials.pdf]

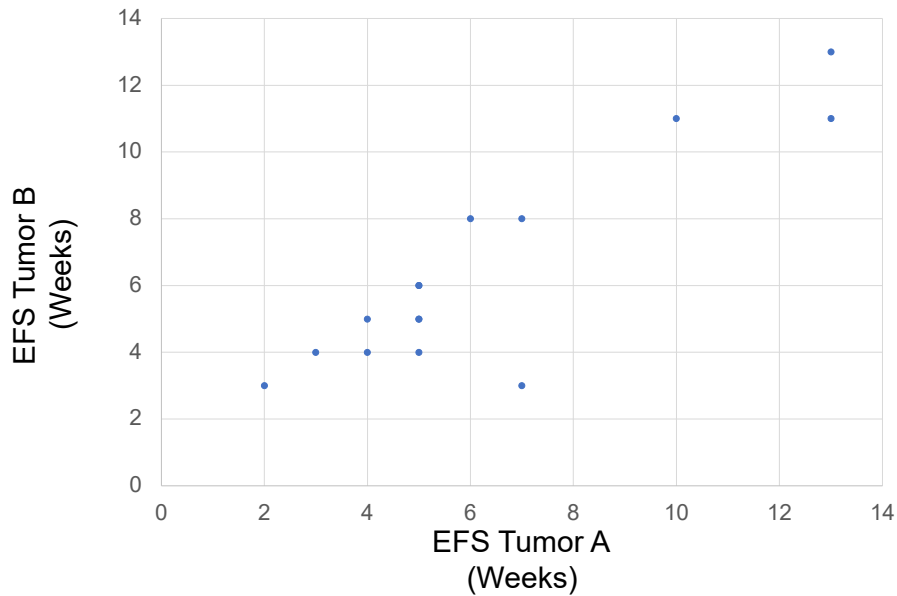

1  
2 **Supplemental Figure 1.** Correlation between time to event (weeks) for the same tumor line  
3 transplanted into two mice ( $n = 16$ ). For VAC cycle 2 of therapy, two mice were transplanted  
4 with the same line from cycle 1 in case of mortality in cycle 2. The graph shows the EFS for  
5 each tumor (designated A or B) for the same model in different mice. Overall, the EFS times are  
6 similar for both tumors for the same model. VAC: Vincristine/actinomycin-D/cyclophosphamide;  
7 EFS: event-free survival.  
8
